# Supplementary material
Source: PubMed Central journal article supplement (PMC6033048)
Supplement: blood793786-suppl1.pdf [file blood793786-suppl1.pdf]

## Supplementary Tables

Supplementary Table 1. Underlying malignancy for which patients underwent stem cell transplant

| Indication for transplant, n   | Patients<br>(N = 42) |
|--------------------------------|----------------------|
| Acute lymphoblastic leukemia   | 9                    |
| Acute myelogenous leukemia     | 9                    |
| Chronic lymphocytic leukemia   | 7                    |
| Chronic myelogenous leukemia   | 3                    |
| Myelofibrosis                  | 3                    |
| Myelodysplastic syndrome       | 3                    |
| Hodgkin lymphoma               | 3                    |
| Aplastic anemia                | 2                    |
| T-cell prolymphocytic leukemia | 1                    |
| T-cell-type acute leukemia     | 1                    |
| Diffuse large B-cell lymphoma  | 1                    |

**Supplementary Table 2. Additional immunosuppressive therapies\* in use at baseline**

|                                                                 | <b>Patients<br/>(N = 42)<br/>n (%)</b> |
|-----------------------------------------------------------------|----------------------------------------|
| Patients with any immunosuppressants other than corticosteroids | 21 (50)                                |
| Calcineurin inhibitors                                          | 17 (41)                                |
| Tacrolimus                                                      | 14 (33)                                |
| Cyclosporine A                                                  | 3 (7)                                  |
| Selective immunosuppressants                                    | 7 (17)                                 |
| Mycophenolate mofetil                                           | 4 (10)                                 |
| Sirolimus                                                       | 3 (7)                                  |

\*Does not include 1 patient who was treated with extracorporeal photopheresis (ECP) every 2 weeks, but did not receive ECP therapy on the day that ibrutinib was initiated.

**Supplementary Table 3. Disposition of patients who discontinued study treatment**

|                                                  | <b>Patients<br/>(N = 42)</b> |
|--------------------------------------------------|------------------------------|
| Median time on study (range) — months            | 13.9 (0.5–24.9)              |
| Median time on treatment (range) — months        | 4.4 (0.2–24.9)               |
| Patients still on treatment — no. (%)            | 12 (29)                      |
| Reasons for treatment discontinuation, n (%)     |                              |
| Adverse events (including death)*                | 14 (33)                      |
| Patient decision†                                | 6 (14)                       |
| Progression of cGVHD                             | 5 (12)                       |
| Recurrence or progression of original malignancy | 2 (5)                        |
| Investigator decision†                           | 2 (5)                        |
| Noncompliance with study drug                    | 1 (2)                        |

\*AEs leading to discontinuation in > 1 patient included fatigue (n=3) and pneumonia (n=2).

†1 patient in each group (total of 2 patients) discontinued after resolution of cGVHD symptoms.

**Supplementary Table 4. Serious AEs**

| <b>Serious AEs<br/>(N = 42)</b>        | <b>All Grades<br/>n (%)</b> | <b>Grades 3-4<br/>n (%)</b> | <b>Grade 5<br/>n (%)</b> |
|----------------------------------------|-----------------------------|-----------------------------|--------------------------|
| Pneumonia                              | 6 (14)                      | 5 (12)                      | 1 (2)                    |
| Pyrexia                                | 2 (5)                       | 2 (5)                       | 0                        |
| Septic shock                           | 2 (5)                       | 2 (5)                       | 0                        |
| Headache                               | 2 (5)                       | 1 (2)                       | 0                        |
| Cellulitis                             | 2 (5)                       | 0                           | 0                        |
| Bronchopulmonary aspergillosis         | 1 (2)                       | 0                           | 1 (2)                    |
| Anemia                                 | 1 (2)                       | 1 (2)                       | 0                        |
| Atrial fibrillation                    | 1 (2)                       | 1 (2)                       | 0                        |
| Bacteremia                             | 1 (2)                       | 1 (2)                       | 0                        |
| Brain abscess                          | 1 (2)                       | 1 (2)                       | 0                        |
| <i>Clostridium difficile</i> infection | 1 (2)                       | 1 (2)                       | 0                        |
| Rhinovirus infection                   | 1 (2)                       | 1 (2)                       | 0                        |
| Staphylococcal bacteremia              | 1 (2)                       | 1 (2)                       | 0                        |
| Femoral fracture                       | 1 (2)                       | 1 (2)                       | 0                        |
| QT prolongation                        | 1 (2)                       | 1 (2)                       | 0                        |
| Arthralgia                             | 1 (2)                       | 1 (2)                       | 0                        |
| Myalgia                                | 1 (2)                       | 1 (2)                       | 0                        |
| Acute lymphocytic leukemia*            | 1 (2)                       | 1 (2)                       | 0                        |
| Prolymphocytic leukemia*               | 1 (2)                       | 1 (2)                       | 0                        |
| Syncope                                | 1 (2)                       | 1 (2)                       | 0                        |
| Respiratory failure                    | 1 (2)                       | 1 (2)                       | 0                        |
| Skin pain                              | 1 (2)                       | 1 (2)                       | 0                        |
| Skin mass                              | 1 (2)                       | 1 (2)                       | 0                        |
| Deep vein thrombosis                   | 1 (2)                       | 1 (2)                       | 0                        |
| Viral pneumonia                        | 1 (2)                       | 0                           | 0                        |
| Compression fracture                   | 1 (2)                       | 0                           | 0                        |
| Muscular weakness                      | 1 (2)                       | 0                           | 0                        |
| Dyspnea                                | 1 (2)                       | 0                           | 0                        |
| Pneumothorax                           | 1 (2)                       | 0                           | 0                        |
| Hypertension                           | 1 (2)                       | 0                           | 0                        |

\*Relapse of underlying disease that was the indication for transplant.
